# Supplementary material for: Removal of Calcareous Concretions from Marine Archaeological Ceramics by Means of a Stimuli-Responsive Hydrogel
Source: MDPI journal article supplement (doi:10.3390/polym15132929), 2023-07-02
Supplement: s1 [file s1]

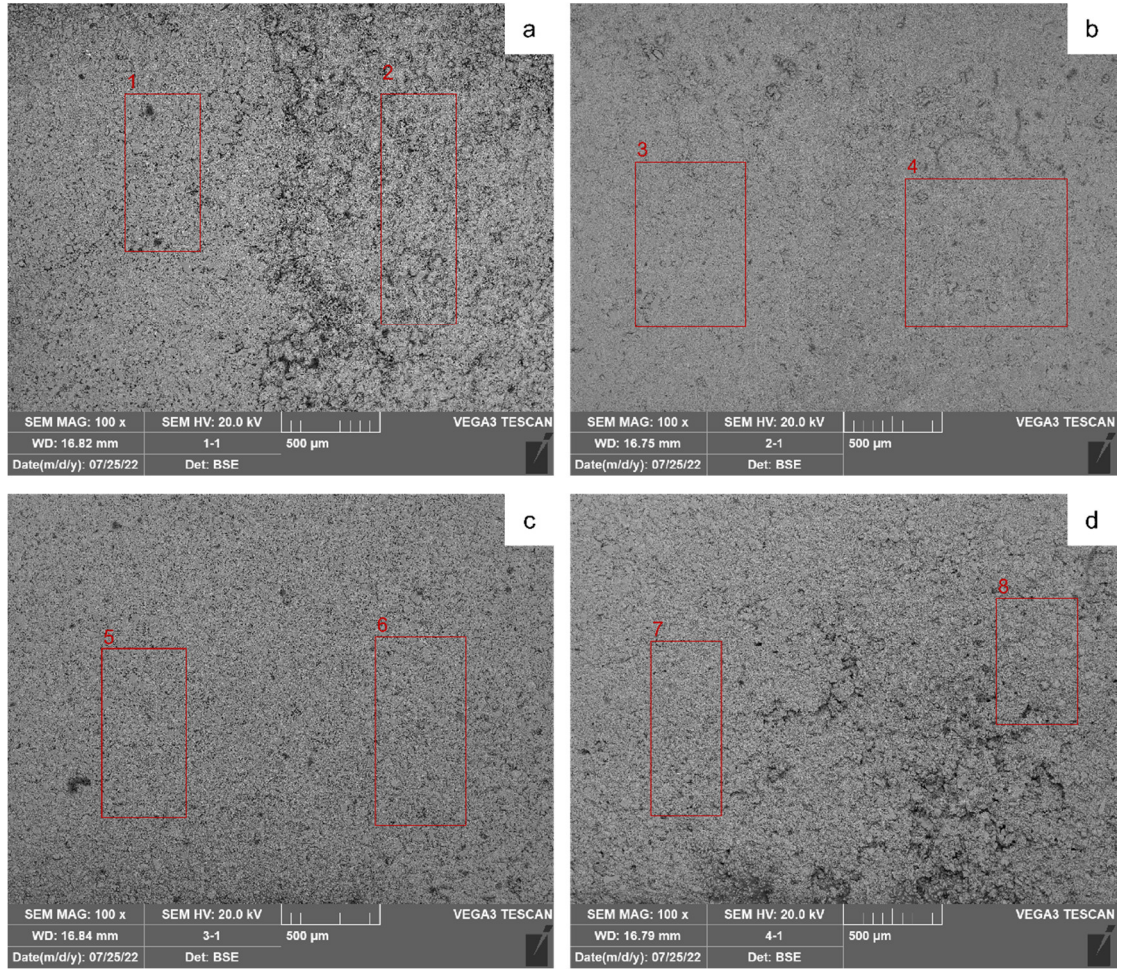

Figure S1: SEM results of treated and untreated area of mocked samples

Table S1: EDS results of treated and untreated areas of mocked samples (%)

| Code | O    | Ca   |
|------|------|------|
| 1    | 51.2 | 48.8 |
| 2    | 52.3 | 47.7 |
| 3    | 50.2 | 49.8 |
| 4    | 52.3 | 47.7 |
| 5    | 50.5 | 49.5 |
| 6    | 51.4 | 48.6 |
| 7    | 52.1 | 49.8 |
| 8    | 51.5 | 47.7 |
